# Supplementary material for: Efficacy of an Objective Structured Clinical Examination Training Approach for Training Pharmacy Students in Diabetes Mellitus Counseling: A Randomized Controlled Trial
Source: MDPI journal article supplement (doi:10.3390/pharmacy8040229), 2020-11-26
Supplement: s1 [file s1]

## Knowledge assessment 2 (Multiple-choice test on diabetes mellitus)

Participant code: \_\_\_\_\_

Date: \_\_\_\_\_

Please tick the correct answer. **There is always only one answer correct.**

- 1) Which statement about diabetes mellitus is correct?
  - (A) The main symptom of diabetes mellitus is hypoglycemia.
  - (B) Long-term complications can be micro- and macroangiopathies.
  - (C) In most cases, type 1 diabetes mellitus is insulin resistant.
  - (D) Type 1 diabetes mellitus usually only manifests in adulthood.
  
- 2) Which statement about metformin is correct?
  - (A) Metformin is insulinotropic.
  - (B) Metformin leads to weight gain.
  - (C) Metformin in monotherapy does not lead to hypoglycemia.
  - (D) Metformin is the first choice for the treatment of type 1 diabetes mellitus.
  
- 3) Which statement about sulfonylureas is correct?
  - (A) Sulfonylureas lower insulin secretion.
  - (B) A common side effect of sulfonylureas is hyperglycemia.
  - (C) Sulfonylureas are not insulinotropic.
  - (D) Sulfonylureas can lead to weight gain.
  
- 4) Which statement about DPP4-inhibitors is correct?
  - (A) SGLT2 inhibitors are insulinotropic.
  - (B) Alpha-glucosidase inhibitors reduce postprandial blood sugar spikes.
  - (C) DPP4-inhibitors inhibit the action of the incretins.
  - (D) Glinides are not insulinotropic.
