# Supplementary material for: Efficacy of an Objective Structured Clinical Examination Training Approach for Training Pharmacy Students in Diabetes Mellitus Counseling: A Randomized Controlled Trial
Source: MDPI journal article supplement (doi:10.3390/pharmacy8040229), 2020-11-26
Supplement: s1 [file s1]

## Self-assessment questionnaire

Participant code: \_\_\_\_\_

Date: \_\_\_\_\_

How do you assess your competence in the following areas?  
Please check the boxes.

|                                                                                                                |                                               |                                      |                                               |                                            |                                   |                                            |
|----------------------------------------------------------------------------------------------------------------|-----------------------------------------------|--------------------------------------|-----------------------------------------------|--------------------------------------------|-----------------------------------|--------------------------------------------|
| 1. I feel competent in counseling a patient with diabetes mellitus.                                            | <input type="checkbox"/><br>Strongly disagree | <input type="checkbox"/><br>Disagree | <input type="checkbox"/><br>Slightly disagree | <input type="checkbox"/><br>Slightly agree | <input type="checkbox"/><br>Agree | <input type="checkbox"/><br>Strongly agree |
| 2. I feel competent to motivate a patient to carry out the therapy.                                            | <input type="checkbox"/><br>Strongly disagree | <input type="checkbox"/><br>Disagree | <input type="checkbox"/><br>Slightly disagree | <input type="checkbox"/><br>Slightly agree | <input type="checkbox"/><br>Agree | <input type="checkbox"/><br>Strongly agree |
| 3. I feel able to listen actively during a consultation.                                                       | <input type="checkbox"/><br>Strongly disagree | <input type="checkbox"/><br>Disagree | <input type="checkbox"/><br>Slightly disagree | <input type="checkbox"/><br>Slightly agree | <input type="checkbox"/><br>Agree | <input type="checkbox"/><br>Strongly agree |
| 4. I feel able to guide the patient through questions.                                                         | <input type="checkbox"/><br>Strongly disagree | <input type="checkbox"/><br>Disagree | <input type="checkbox"/><br>Slightly disagree | <input type="checkbox"/><br>Slightly agree | <input type="checkbox"/><br>Agree | <input type="checkbox"/><br>Strongly agree |
| 5. I feel able to structure a consultation based on the time available (10 minutes).                           | <input type="checkbox"/><br>Strongly disagree | <input type="checkbox"/><br>Disagree | <input type="checkbox"/><br>Slightly disagree | <input type="checkbox"/><br>Slightly agree | <input type="checkbox"/><br>Agree | <input type="checkbox"/><br>Strongly agree |
| 6. I feel competent to pass on correct, relevant, and useful information to the patient during the counseling. | <input type="checkbox"/><br>Strongly disagree | <input type="checkbox"/><br>Disagree | <input type="checkbox"/><br>Slightly disagree | <input type="checkbox"/><br>Slightly agree | <input type="checkbox"/><br>Agree | <input type="checkbox"/><br>Strongly agree |
| 7. I feel competent to convey my specialist knowledge in lay language.                                         | <input type="checkbox"/><br>Strongly disagree | <input type="checkbox"/><br>Disagree | <input type="checkbox"/><br>Slightly disagree | <input type="checkbox"/><br>Slightly agree | <input type="checkbox"/><br>Agree | <input type="checkbox"/><br>Strongly agree |
