# Supplementary material for: Efficacy of an Objective Structured Clinical Examination Training Approach for Training Pharmacy Students in Diabetes Mellitus Counseling: A Randomized Controlled Trial
Source: Pharmacy (Basel). 2020 Nov 26;8(4):229. doi: 10.3390/pharmacy8040229 (PMC7712022; doi:10.3390/pharmacy8040229)
Supplement: Supplementary file 1 [file pharmacy-08-00229-s001.zip]

Archive with 5 entries (5 files):
- Supplemental Material 1 OSCE Case 1.pdf
- Supplemental Material 2 OSCE Case 2.pdf
- Supplemental Material 3 Multiple-choice test 1.pdf
- Supplemental Material 4 Multiple-choice test 2.pdf
- Supplemental Material 5 Self-assessment questionnaire.pdf
